# Supplementary material for: Syntheses, characterization, crystal structures and applications as sensitizers in solar cells of novel heteroleptic Cu(i) complexes containing nitrile-substituted 2,2′-bipyridyl ligands
Source: Royal Society of Chemistry journal article supplement (doi:10.1039/d3dt02777e), 2023-11-28
Supplement: d3dt02777e1.pdf [file d3dt02777e1.pdf]

## SUPPLEMENTARY MATERIAL

### Syntheses, characterizations, crystal structures and applications as sensitizers in solar cells of novel heteroleptic Cu(I) complexes containing nitrile-substituted 2,2'-bipyridyl ligands

Tomás, Federico M.A.<sup>1</sup>; Calvo, Natalia L.<sup>2</sup>; Vega, Nadia C.<sup>3</sup>; Morán Vieyra, Faustino E.<sup>4</sup>; Vega, Daniel R.<sup>5</sup>; Comedi, David<sup>3</sup>; Katz, Néstor E.<sup>1</sup>; Fagalde, Florencia<sup>1\*</sup>

<sup>1</sup> INQUINOA (CONICET-UNT), Facultad de Bioquímica, Química y Farmacia, Universidad Nacional de Tucumán, Ayacucho 471, (T4000INI), San Miguel de Tucumán, Argentina.

<sup>2</sup> IQUIR (CONICET-UNR) Facultad de Ciencias Bioquímicas y Farmacéuticas, Universidad Nacional de Rosario, Rosario, Santa Fe, Argentina.

<sup>3</sup> INFINOA (CONICET-UNT) y Departamento de Física, Facultad de Ciencias Exactas y Tecnología, UNT, Av. Independencia 1800, (T4002BLR) S. M. de Tucumán, Argentina.

<sup>4</sup> INBIONATEC (CONICET-UNSE), RN9, Km 1125, Villa El Zanjón, Santiago del Estero, Argentina.

<sup>5</sup> Departamento Física de la Materia Condensada, GlyA, CAC, CNEA, Av. Gral. Paz 1499, B1650KNA, San Martín, Buenos Aires, Argentina.

### Table of Contents

| Subject                                                                                                                                                                                                                                                               | Page N° |
|-----------------------------------------------------------------------------------------------------------------------------------------------------------------------------------------------------------------------------------------------------------------------|---------|
| <b>Figure S1.-</b> ORTEP representation of <b>(1)</b> (Left) and <b>(2)</b> (Right) showing the numbering scheme used and displacement ellipsoids drawn at the 50% probability level.                                                                                 | S-2     |
| <b>Table S1.-</b> Crystal data and structure refinement at 298 K for <b>(1)</b> and <b>(2)</b> .                                                                                                                                                                      | S-2     |
| <b>Figure S2.-</b> Optimized structures and labels for <b>(1, Left)</b> and <b>(2, Right)</b> with B3LYP/6-311G(d,p) in CH <sub>2</sub> Cl <sub>2</sub> .                                                                                                             | S-3     |
| <b>Table S2.-</b> Geometric description for hydrogen bond interactions for <b>(1)</b> and <b>(2)</b> . [Å and °].                                                                                                                                                     | S-3     |
| <b>Table S3.-</b> Torsion angles [°] for <b>(1)</b> .                                                                                                                                                                                                                 | S-4     |
| <b>Table S4.-</b> Torsion angles [°] for <b>(2)</b> .                                                                                                                                                                                                                 | S-6     |
| <b>Figure S3.-</b> <sup>1</sup> H-NMR spectrum for <b>1</b> in CD <sub>3</sub> OCD <sub>3</sub> ν= 400 MHz. Inset: Expansion to the region between δ≈ 9.0 and 8.5 ppm.                                                                                                | S-9     |
| <b>Figure S4.-</b> <sup>1</sup> H-NMR spectrum for <b>2</b> in CD <sub>3</sub> OCD <sub>3</sub> ν= 400 mHz.                                                                                                                                                           | S-9     |
| <b>Figure S5.-</b> Alphabetical assignment of the protons of <b>(1, Left)</b> and <b>(2, Right)</b> . The bond distances and angle values are arbitrary.                                                                                                              | S-10    |
| <b>Figure S6.-</b> MLCT Band II of <b>(1)</b> fitted with two Gaussian functions. The curves corresponding to the LC transitions are not shown, since their contribution is negligible in this region of the spectrum. <b>Inset table:</b> calculated fit parameters. | S-10    |
| <b>Figure S7.-</b> Cyclic and square wave voltammograms for the first oxidation wave of <b>(1)</b> and <b>(2)</b> in CH <sub>2</sub> Cl <sub>2</sub> 0.1 M TBAH. WE: Glassy carbon, IRE: Ferrocene, CE: Pt wire, ν= 100 mV s <sup>-1</sup>                            | S11     |
| <b>Figure S8.-</b> Raman Spectrum of FTO/TiO <sub>2</sub> . λ= 532 nm                                                                                                                                                                                                 | S-12    |

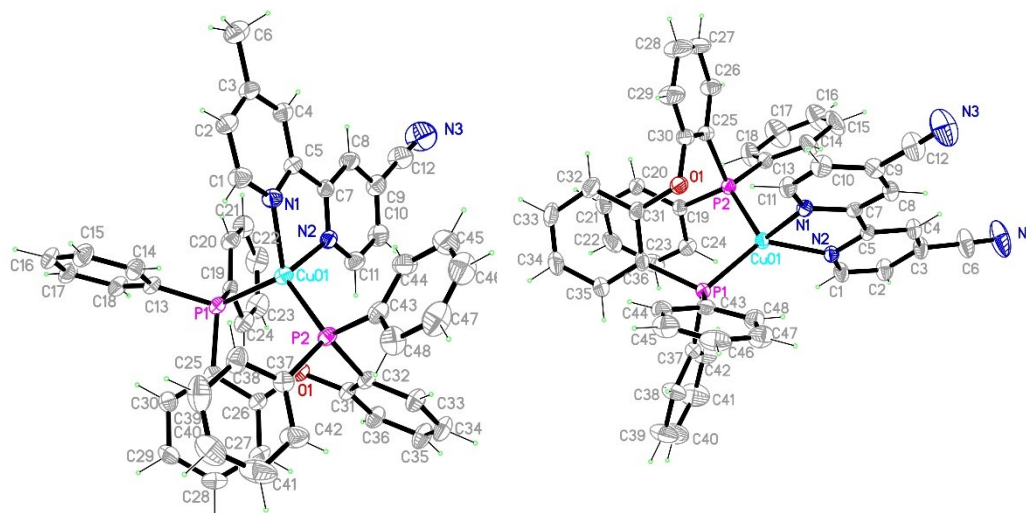

**Figure S1.** ORTEP representation of (1) (Left) and (2) (Right) showing the numbering scheme used and displacement ellipsoids drawn at the 50% probability level.

**Table S1.-** Crystal data and structure refinement at 298 K for (1) and (2).

| Variable /Complex                         | (1)                                                                                           |                | (2)                                                                                           |                 |
|-------------------------------------------|-----------------------------------------------------------------------------------------------|----------------|-----------------------------------------------------------------------------------------------|-----------------|
| <b>Empirical formula</b>                  | C <sub>52</sub> H <sub>47</sub> CuF <sub>6</sub> N <sub>3</sub> O <sub>2</sub> P <sub>3</sub> |                | C <sub>52</sub> H <sub>44</sub> CuF <sub>6</sub> N <sub>4</sub> O <sub>2</sub> P <sub>3</sub> |                 |
| <b>Formula weight</b>                     | 1016.37                                                                                       |                | 1027.36                                                                                       |                 |
| <b>Crystal system</b>                     | Triclinic                                                                                     |                | Monoclinic                                                                                    |                 |
| <b>Space group, Z</b>                     | P-1, 2                                                                                        |                | P 21/c, 4                                                                                     |                 |
| <b>Unit cell dimensions</b>               | a =                                                                                           |                | a = 20.2471(8)                                                                                |                 |
| <b>a, b, c (Å)</b>                        | 10.9709(4)                                                                                    | α = 106.020(2) | α = 90°                                                                                       |                 |
| <b>α, β, γ (°)</b>                        | b = 12.4043(5)                                                                                | β = 96.377(2)  | b = 12.9760(5)                                                                                | β = 92.1830(10) |
|                                           | c = 19.8431(8)                                                                                | γ = 105.536(2) | c = 18.7049(7)                                                                                | γ = 90°         |
| <b>Cell volume (Å<sup>3</sup>)</b>        | 2450.27(17)                                                                                   |                | 4910.7(3)                                                                                     |                 |
| <b>Density (calcd., mg/m<sup>3</sup>)</b> | 1.378                                                                                         |                | 1.390                                                                                         |                 |
| <b>Absorption coef. (mm<sup>-1</sup>)</b> | 0.610                                                                                         |                | 0.610                                                                                         |                 |
| <b>F(000)</b>                             | 1048                                                                                          |                | 2112                                                                                          |                 |
| <b>Crystal size (mm<sup>3</sup>)</b>      | 0.400 x 0.100 x 0.050                                                                         |                | 0.700 x 0.300 x 0.080                                                                         |                 |
| <b>θ range for data collection (°)</b>    | 1.780 to 26.405                                                                               |                | 1.864 to 26.377                                                                               |                 |
| <b>Reflections collected</b>              | 126281                                                                                        |                | 147602                                                                                        |                 |
| <b>Independent reflections</b>            | 10041 [R(int) = 0.1264]                                                                       |                | 10046 [R(int) = 0.1018]                                                                       |                 |
| <b>Refinement method</b>                  | Full-matrix least-squares on F <sup>2</sup>                                                   |                |                                                                                               |                 |

|                                   |                                       |                                       |
|-----------------------------------|---------------------------------------|---------------------------------------|
| Data / restraints / parameters    | 10041 / 4 / 605                       | 10046 / 4 / 613                       |
| Goodness-of-fit on F <sup>2</sup> | 1.154                                 | 1.177                                 |
| Final R indices [I > 2σ(I)]       | R1 = 0.0882, wR <sup>2</sup> = 0.2077 | R1 = 0.0632, wR <sup>2</sup> = 0.1455 |
| R indices (all data)              | R1 = 0.1261, wR <sup>2</sup> = 0.2343 | R1 = 0.0932, wR <sup>2</sup> = 0.1686 |
| CCDC deposition number:           | 2287810                               | 2287809                               |

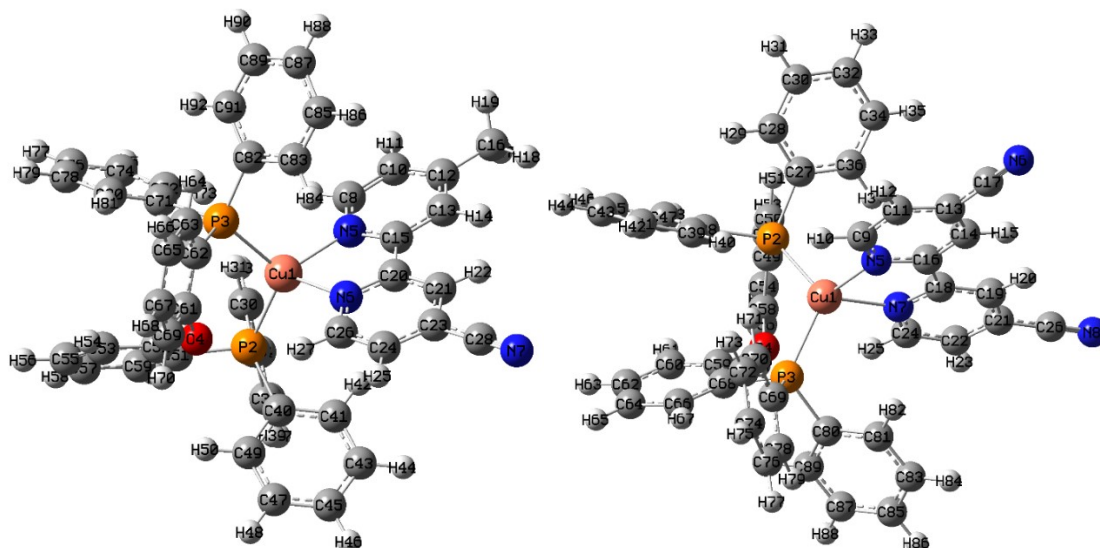

Figure S2.- Optimized structures and labels for (1, left) and (2, right) with B3LYP/6-311G(d,p) in CH<sub>2</sub>Cl<sub>2</sub>.

Table S2. Geometric description for hydrogen bond interactions for (1) and (2). [Å and °].

| D-H...A               | d(D-H) | d(H...A) | d(D...A)  | <(DHA) |
|-----------------------|--------|----------|-----------|--------|
| <b>Complex (1)</b>    |        |          |           |        |
| C(52)-H(52C)...N(3)#1 | 0.96   | 2.49     | 3.42(2)   | 163.0  |
| C(46)-H(46)...N(3)#2  | 0.93   | 2.75     | 3.432(15) | 131.05 |
| <b>Complex (2)</b>    |        |          |           |        |
| C(14)-H(14)...N(4)#3  | 0.93   | 2.75     | 3.467(15) | 135.55 |
| C(1)-H(1)...F(1)#4    | 0.93   | 2.60     | 3.506(6)  | 165.9  |
| C(2)-H(2)...F(4)#4    | 0.93   | 2.52     | 3.207(6)  | 131.0  |
| C(11)-H(11)...O(1)    | 0.93   | 2.45     | 3.175(5)  | 134.8  |
| C(24)-H(24)...F(3)#4  | 0.93   | 2.64     | 3.366(6)  | 135.6  |
| C(48)-H(48)...F(5)    | 0.93   | 2.39     | 3.075(6)  | 130.5  |

Symmetry transformations used to generate equivalent atoms:

#1 1-x, 2-y, 2-z

#2 x, 1+y, z

#3 1-x, -1/2+y, 1/2+z

#4 x, -y+1/2, z-1/2

Table S3. Torsion angles [°] for (1).

|                         |           |
|-------------------------|-----------|
| C(5)-N(1)-C(1)-C(2)     | 1.2(10)   |
| Cu(01)-N(1)-C(1)-C(2)   | -167.8(5) |
| N(1)-C(1)-C(2)-C(3)     | -1.6(11)  |
| C(1)-C(2)-C(3)-C(4)     | 0.7(10)   |
| C(1)-C(2)-C(3)-C(6)     | 178.7(7)  |
| C(2)-C(3)-C(4)-C(5)     | 0.6(9)    |
| C(6)-C(3)-C(4)-C(5)     | -177.5(6) |
| C(1)-N(1)-C(5)-C(4)     | 0.2(9)    |
| Cu(01)-N(1)-C(5)-C(4)   | 170.7(4)  |
| C(1)-N(1)-C(5)-C(7)     | -179.0(5) |
| Cu(01)-N(1)-C(5)-C(7)   | -8.5(6)   |
| C(3)-C(4)-C(5)-N(1)     | -1.1(9)   |
| C(3)-C(4)-C(5)-C(7)     | 178.1(6)  |
| C(11)-N(2)-C(7)-C(8)    | -1.6(8)   |
| Cu(01)-N(2)-C(7)-C(8)   | -176.7(5) |
| C(11)-N(2)-C(7)-C(5)    | 177.3(5)  |
| Cu(01)-N(2)-C(7)-C(5)   | 2.2(6)    |
| N(1)-C(5)-C(7)-N(2)     | 4.2(7)    |
| C(4)-C(5)-C(7)-N(2)     | -175.0(5) |
| N(1)-C(5)-C(7)-C(8)     | -176.9(6) |
| C(4)-C(5)-C(7)-C(8)     | 3.9(9)    |
| N(2)-C(7)-C(8)-C(9)     | -0.4(9)   |
| C(5)-C(7)-C(8)-C(9)     | -179.2(6) |
| C(7)-C(8)-C(9)-C(10)    | 1.7(10)   |
| C(7)-C(8)-C(9)-C(12)    | -177.9(7) |
| C(8)-C(9)-C(10)-C(11)   | -1.0(11)  |
| C(12)-C(9)-C(10)-C(11)  | 178.5(7)  |
| C(7)-N(2)-C(11)-C(10)   | 2.3(9)    |
| Cu(01)-N(2)-C(11)-C(10) | 176.6(5)  |
| C(9)-C(10)-C(11)-N(2)   | -1.0(11)  |
| C(25)-P(1)-C(13)-C(18)  | -77.8(5)  |
| C(19)-P(1)-C(13)-C(18)  | 32.4(6)   |
| Cu(01)-P(1)-C(13)-C(18) | 154.8(4)  |
| C(25)-P(1)-C(13)-C(14)  | 99.7(5)   |
| C(19)-P(1)-C(13)-C(14)  | -150.1(5) |
| Cu(01)-P(1)-C(13)-C(14) | -27.8(5)  |
| C(18)-C(13)-C(14)-C(15) | 0.4(9)    |
| P(1)-C(13)-C(14)-C(15)  | -177.1(5) |
| C(13)-C(14)-C(15)-C(16) | 0.8(10)   |
| C(14)-C(15)-C(16)-C(17) | -1.4(11)  |
| C(15)-C(16)-C(17)-C(18) | 0.8(11)   |
| C(14)-C(13)-C(18)-C(17) | -1.0(9)   |
| P(1)-C(13)-C(18)-C(17)  | 176.5(5)  |
| C(16)-C(17)-C(18)-C(13) | 0.4(10)   |
| C(25)-P(1)-C(19)-C(20)  | 174.1(4)  |
| C(13)-P(1)-C(19)-C(20)  | 65.8(5)   |
| Cu(01)-P(1)-C(19)-C(20) | -65.2(5)  |
| C(25)-P(1)-C(19)-C(24)  | -13.7(6)  |
| C(13)-P(1)-C(19)-C(24)  | -122.0(5) |
| Cu(01)-P(1)-C(19)-C(24) | 107.0(5)  |
| C(24)-C(19)-C(20)-C(21) | 1.8(9)    |
| P(1)-C(19)-C(20)-C(21)  | 174.4(5)  |

|                         |           |
|-------------------------|-----------|
| C(19)-C(20)-C(21)-C(22) | -2.6(10)  |
| C(20)-C(21)-C(22)-C(23) | 1.4(12)   |
| C(21)-C(22)-C(23)-C(24) | 0.5(12)   |
| C(22)-C(23)-C(24)-C(19) | -1.3(11)  |
| C(20)-C(19)-C(24)-C(23) | 0.1(9)    |
| P(1)-C(19)-C(24)-C(23)  | -172.0(5) |
| C(13)-P(1)-C(25)-C(30)  | -0.1(5)   |
| C(19)-P(1)-C(25)-C(30)  | -109.3(5) |
| Cu(01)-P(1)-C(25)-C(30) | 133.0(4)  |
| C(13)-P(1)-C(25)-C(26)  | -172.7(4) |
| C(19)-P(1)-C(25)-C(26)  | 78.1(4)   |
| Cu(01)-P(1)-C(25)-C(26) | -39.6(4)  |
| C(31)-O(1)-C(26)-C(27)  | -27.8(7)  |
| C(31)-O(1)-C(26)-C(25)  | 153.2(5)  |
| C(30)-C(25)-C(26)-C(27) | -1.5(8)   |
| P(1)-C(25)-C(26)-C(27)  | 171.7(4)  |
| C(30)-C(25)-C(26)-O(1)  | 177.4(5)  |
| P(1)-C(25)-C(26)-O(1)   | -9.4(6)   |
| O(1)-C(26)-C(27)-C(28)  | -177.6(5) |
| C(25)-C(26)-C(27)-C(28) | 1.3(9)    |
| C(26)-C(27)-C(28)-C(29) | -0.7(9)   |
| C(27)-C(28)-C(29)-C(30) | 0.5(10)   |
| C(28)-C(29)-C(30)-C(25) | -0.8(10)  |
| C(26)-C(25)-C(30)-C(29) | 1.3(8)    |
| P(1)-C(25)-C(30)-C(29)  | -171.3(5) |
| C(26)-O(1)-C(31)-C(36)  | 95.4(6)   |
| C(26)-O(1)-C(31)-C(32)  | -88.0(6)  |
| C(36)-C(31)-C(32)-C(33) | -3.4(9)   |
| O(1)-C(31)-C(32)-C(33)  | -179.9(5) |
| C(36)-C(31)-C(32)-P(2)  | 173.5(5)  |
| O(1)-C(31)-C(32)-P(2)   | -2.9(7)   |
| C(37)-P(2)-C(32)-C(33)  | -92.3(6)  |
| C(43)-P(2)-C(32)-C(33)  | 16.2(6)   |
| Cu(01)-P(2)-C(32)-C(33) | 143.3(5)  |
| C(37)-P(2)-C(32)-C(31)  | 91.0(5)   |
| C(43)-P(2)-C(32)-C(31)  | -160.5(5) |
| Cu(01)-P(2)-C(32)-C(31) | -33.4(5)  |
| C(31)-C(32)-C(33)-C(34) | 0.9(9)    |
| P(2)-C(32)-C(33)-C(34)  | -175.8(5) |
| C(32)-C(33)-C(34)-C(35) | 1.7(11)   |
| C(33)-C(34)-C(35)-C(36) | -2.0(12)  |
| C(34)-C(35)-C(36)-C(31) | -0.4(11)  |
| C(32)-C(31)-C(36)-C(35) | 3.2(10)   |
| O(1)-C(31)-C(36)-C(35)  | 179.7(6)  |
| C(43)-P(2)-C(37)-C(38)  | 92.1(5)   |
| C(32)-P(2)-C(37)-C(38)  | -160.9(5) |
| Cu(01)-P(2)-C(37)-C(38) | -36.6(5)  |
| C(43)-P(2)-C(37)-C(42)  | -86.5(6)  |
| C(32)-P(2)-C(37)-C(42)  | 20.5(7)   |
| Cu(01)-P(2)-C(37)-C(42) | 144.8(6)  |
| C(42)-C(37)-C(38)-C(39) | -1.0(10)  |
| P(2)-C(37)-C(38)-C(39)  | -179.7(6) |

|                         |           |
|-------------------------|-----------|
| C(37)-C(38)-C(39)-C(40) | -0.4(12)  |
| C(38)-C(39)-C(40)-C(41) | 1.9(14)   |
| C(39)-C(40)-C(41)-C(42) | -1.9(16)  |
| C(38)-C(37)-C(42)-C(41) | 1.0(12)   |
| P(2)-C(37)-C(42)-C(41)  | 179.6(7)  |
| C(40)-C(41)-C(42)-C(37) | 0.4(15)   |
| C(37)-P(2)-C(43)-C(48)  | 23.0(6)   |
| C(32)-P(2)-C(43)-C(48)  | -85.8(6)  |
| Cu(01)-P(2)-C(43)-C(48) | 149.5(5)  |
| C(37)-P(2)-C(43)-C(44)  | -158.3(5) |
| C(32)-P(2)-C(43)-C(44)  | 92.9(5)   |
| Cu(01)-P(2)-C(43)-C(44) | -31.8(6)  |
| C(48)-C(43)-C(44)-C(45) | -0.6(11)  |
| P(2)-C(43)-C(44)-C(45)  | -179.4(6) |
| C(43)-C(44)-C(45)-C(46) | -0.2(12)  |
| C(44)-C(45)-C(46)-C(47) | 1.4(14)   |
| C(45)-C(46)-C(47)-C(48) | -1.7(14)  |
| C(44)-C(43)-C(48)-C(47) | 0.2(11)   |
| P(2)-C(43)-C(48)-C(47)  | 179.0(6)  |
| C(46)-C(47)-C(48)-C(43) | 0.9(12)   |
| C(51)-O(2)-C(50)-C(49)  | -177(4)   |
| C(50)-O(2)-C(51)-C(52)  | 134(5)    |

**Table S4.** Torsion angles [°] for (2).

|                       |           |
|-----------------------|-----------|
| C(5)-N(2)-C(1)-C(2)   | -1.2(6)   |
| Cu(01)-N(2)-C(1)-C(2) | 163.9(4)  |
| N(2)-C(1)-C(2)-C(3)   | 0.2(7)    |
| C(1)-C(2)-C(3)-C(4)   | 1.2(7)    |
| C(1)-C(2)-C(3)-C(6)   | -178.0(5) |
| C(2)-C(3)-C(4)-C(5)   | -1.6(7)   |
| C(6)-C(3)-C(4)-C(5)   | 177.7(5)  |
| C(1)-N(2)-C(5)-C(4)   | 0.8(6)    |
| Cu(01)-N(2)-C(5)-C(4) | -165.9(3) |
| C(1)-N(2)-C(5)-C(7)   | 178.5(3)  |
| Cu(01)-N(2)-C(5)-C(7) | 11.7(4)   |
| C(3)-C(4)-C(5)-N(2)   | 0.5(6)    |
| C(3)-C(4)-C(5)-C(7)   | -177.0(4) |
| C(11)-N(1)-C(7)-C(8)  | 0.0(5)    |
| Cu(01)-N(1)-C(7)-C(8) | -177.3(3) |
| C(11)-N(1)-C(7)-C(5)  | 179.8(3)  |
| Cu(01)-N(1)-C(7)-C(5) | 2.5(4)    |
| N(2)-C(5)-C(7)-N(1)   | -9.5(5)   |
| C(4)-C(5)-C(7)-N(1)   | 168.2(4)  |
| N(2)-C(5)-C(7)-C(8)   | 170.3(3)  |
| C(4)-C(5)-C(7)-C(8)   | -12.1(6)  |
| N(1)-C(7)-C(8)-C(9)   | -0.8(6)   |
| C(5)-C(7)-C(8)-C(9)   | 179.4(3)  |

|                         |           |
|-------------------------|-----------|
| C(7)-C(8)-C(9)-C(10)    | 0.9(6)    |
| C(7)-C(8)-C(9)-C(12)    | 179.3(4)  |
| C(8)-C(9)-C(10)-C(11)   | -0.1(6)   |
| C(12)-C(9)-C(10)-C(11)  | -178.6(4) |
| C(7)-N(1)-C(11)-C(10)   | 0.7(6)    |
| Cu(01)-N(1)-C(11)-C(10) | 177.7(3)  |
| C(9)-C(10)-C(11)-N(1)   | -0.7(7)   |
| C(19)-P(2)-C(13)-C(18)  | 9.7(5)    |
| C(25)-P(2)-C(13)-C(18)  | -99.3(4)  |
| Cu(01)-P(2)-C(13)-C(18) | 138.8(4)  |
| C(19)-P(2)-C(13)-C(14)  | -172.8(4) |
| C(25)-P(2)-C(13)-C(14)  | 78.2(4)   |
| Cu(01)-P(2)-C(13)-C(14) | -43.8(4)  |
| C(18)-C(13)-C(14)-C(15) | 1.6(8)    |
| P(2)-C(13)-C(14)-C(15)  | -176.0(4) |
| C(13)-C(14)-C(15)-C(16) | -0.9(10)  |
| C(14)-C(15)-C(16)-C(17) | -0.7(12)  |
| C(15)-C(16)-C(17)-C(18) | 1.7(12)   |
| C(14)-C(13)-C(18)-C(17) | -0.6(8)   |
| P(2)-C(13)-C(18)-C(17)  | 176.8(5)  |
| C(16)-C(17)-C(18)-C(13) | -1.0(11)  |
| C(13)-P(2)-C(19)-C(20)  | -103.9(4) |
| C(25)-P(2)-C(19)-C(20)  | 2.6(4)    |
| Cu(01)-P(2)-C(19)-C(20) | 125.2(3)  |
| C(13)-P(2)-C(19)-C(24)  | 75.8(3)   |
| C(25)-P(2)-C(19)-C(24)  | -177.7(3) |
| Cu(01)-P(2)-C(19)-C(24) | -55.1(3)  |
| C(24)-C(19)-C(20)-C(21) | -0.4(6)   |
| P(2)-C(19)-C(20)-C(21)  | 179.3(3)  |
| C(19)-C(20)-C(21)-C(22) | 0.1(7)    |
| C(20)-C(21)-C(22)-C(23) | 0.3(8)    |
| C(21)-C(22)-C(23)-C(24) | -0.3(8)   |
| C(22)-C(23)-C(24)-C(19) | 0.0(7)    |
| C(20)-C(19)-C(24)-C(23) | 0.4(6)    |
| P(2)-C(19)-C(24)-C(23)  | -179.4(3) |
| C(19)-P(2)-C(25)-C(30)  | 91.8(4)   |
| C(13)-P(2)-C(25)-C(30)  | -161.5(3) |
| Cu(01)-P(2)-C(25)-C(30) | -34.1(4)  |
| C(19)-P(2)-C(25)-C(26)  | -93.9(4)  |
| C(13)-P(2)-C(25)-C(26)  | 12.8(4)   |
| Cu(01)-P(2)-C(25)-C(26) | 140.3(3)  |
| C(30)-C(25)-C(26)-C(27) | 1.9(7)    |
| P(2)-C(25)-C(26)-C(27)  | -172.6(4) |
| C(25)-C(26)-C(27)-C(28) | -0.3(8)   |
| C(26)-C(27)-C(28)-C(29) | -0.8(10)  |
| C(27)-C(28)-C(29)-C(30) | 0.2(10)   |
| C(28)-C(29)-C(30)-C(25) | 1.6(8)    |
| C(28)-C(29)-C(30)-O(1)  | 179.2(5)  |
| C(26)-C(25)-C(30)-C(29) | -2.6(7)   |
| P(2)-C(25)-C(30)-C(29)  | 172.1(4)  |
| C(26)-C(25)-C(30)-O(1)  | 179.7(4)  |
| P(2)-C(25)-C(30)-O(1)   | -5.6(5)   |

|                         |            |
|-------------------------|------------|
| C(31)-O(1)-C(30)-C(29)  | 99.5(5)    |
| C(31)-O(1)-C(30)-C(25)  | -82.8(4)   |
| C(30)-O(1)-C(31)-C(32)  | -40.8(5)   |
| C(30)-O(1)-C(31)-C(36)  | 141.8(4)   |
| C(36)-C(31)-C(32)-C(33) | -1.7(7)    |
| O(1)-C(31)-C(32)-C(33)  | -179.1(4)  |
| C(31)-C(32)-C(33)-C(34) | -0.1(8)    |
| C(32)-C(33)-C(34)-C(35) | 0.8(9)     |
| C(33)-C(34)-C(35)-C(36) | 0.1(8)     |
| C(34)-C(35)-C(36)-C(31) | -1.8(7)    |
| C(34)-C(35)-C(36)-P(1)  | 179.7(4)   |
| C(32)-C(31)-C(36)-C(35) | 2.6(6)     |
| O(1)-C(31)-C(36)-C(35)  | -179.9(4)  |
| C(32)-C(31)-C(36)-P(1)  | -178.9(3)  |
| O(1)-C(31)-C(36)-P(1)   | -1.4(5)    |
| C(43)-P(1)-C(36)-C(35)  | -97.6(4)   |
| C(37)-P(1)-C(36)-C(35)  | 8.3(4)     |
| Cu(01)-P(1)-C(36)-C(35) | 138.8(3)   |
| C(43)-P(1)-C(36)-C(31)  | 84.0(3)    |
| C(37)-P(1)-C(36)-C(31)  | -170.1(3)  |
| Cu(01)-P(1)-C(36)-C(31) | -39.6(4)   |
| C(43)-P(1)-C(37)-C(38)  | 21.1(4)    |
| C(36)-P(1)-C(37)-C(38)  | -84.9(4)   |
| Cu(01)-P(1)-C(37)-C(38) | 150.9(3)   |
| C(43)-P(1)-C(37)-C(42)  | -160.0(4)  |
| C(36)-P(1)-C(37)-C(42)  | 94.1(4)    |
| Cu(01)-P(1)-C(37)-C(42) | -30.1(4)   |
| C(42)-C(37)-C(38)-C(39) | -3.8(8)    |
| P(1)-C(37)-C(38)-C(39)  | 175.2(4)   |
| C(37)-C(38)-C(39)-C(40) | 1.3(10)    |
| C(38)-C(39)-C(40)-C(41) | 1.4(11)    |
| C(39)-C(40)-C(41)-C(42) | -1.5(11)   |
| C(40)-C(41)-C(42)-C(37) | -1.1(10)   |
| C(38)-C(37)-C(42)-C(41) | 3.8(8)     |
| P(1)-C(37)-C(42)-C(41)  | -175.3(5)  |
| C(37)-P(1)-C(43)-C(48)  | 89.4(3)    |
| C(36)-P(1)-C(43)-C(48)  | -164.7(3)  |
| Cu(01)-P(1)-C(43)-C(48) | -43.8(3)   |
| C(37)-P(1)-C(43)-C(44)  | -87.5(4)   |
| C(36)-P(1)-C(43)-C(44)  | 18.3(4)    |
| Cu(01)-P(1)-C(43)-C(44) | 139.2(3)   |
| C(48)-C(43)-C(44)-C(45) | -0.1(6)    |
| P(1)-C(43)-C(44)-C(45)  | 176.8(3)   |
| C(43)-C(44)-C(45)-C(46) | -1.1(7)    |
| C(44)-C(45)-C(46)-C(47) | 1.5(8)     |
| C(45)-C(46)-C(47)-C(48) | -0.7(8)    |
| C(44)-C(43)-C(48)-C(47) | 0.9(6)     |
| P(1)-C(43)-C(48)-C(47)  | -176.2(4)  |
| C(46)-C(47)-C(48)-C(43) | -0.5(7)    |
| C(51)-O(2)-C(50)-C(49)  | 162.3(13)  |
| C(50)-O(2)-C(51)-C(52)  | -173.7(12) |



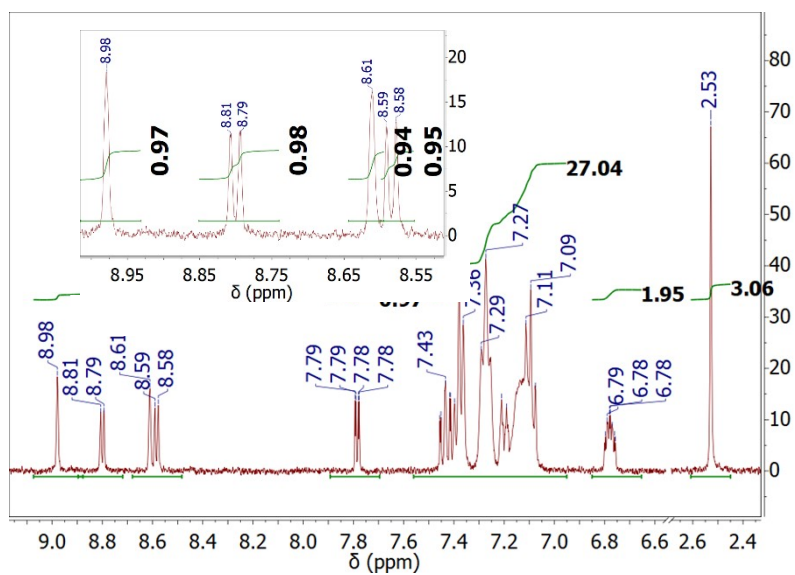

Figure S3.-  $^1\text{H-NMR}$  spectrum for **1** in  $\text{CD}_3\text{OCD}_3$   $\nu = 400$  MHz. Inset: Expansion to the region between  $\delta \approx 9.0$  and  $8.5$  ppm.

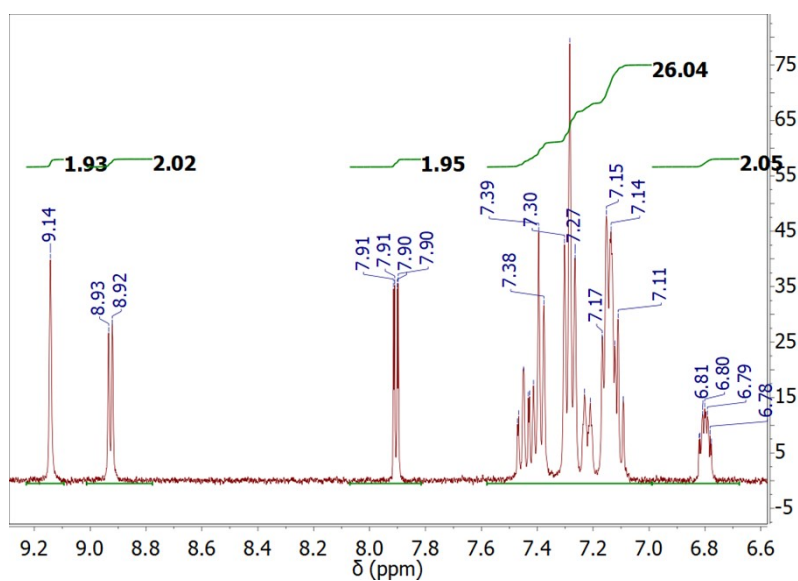

Figure S4.-  $^1\text{H-NMR}$  spectrum for **2** in  $\text{CD}_3\text{OCD}_3$   $\nu = 400$  MHz.

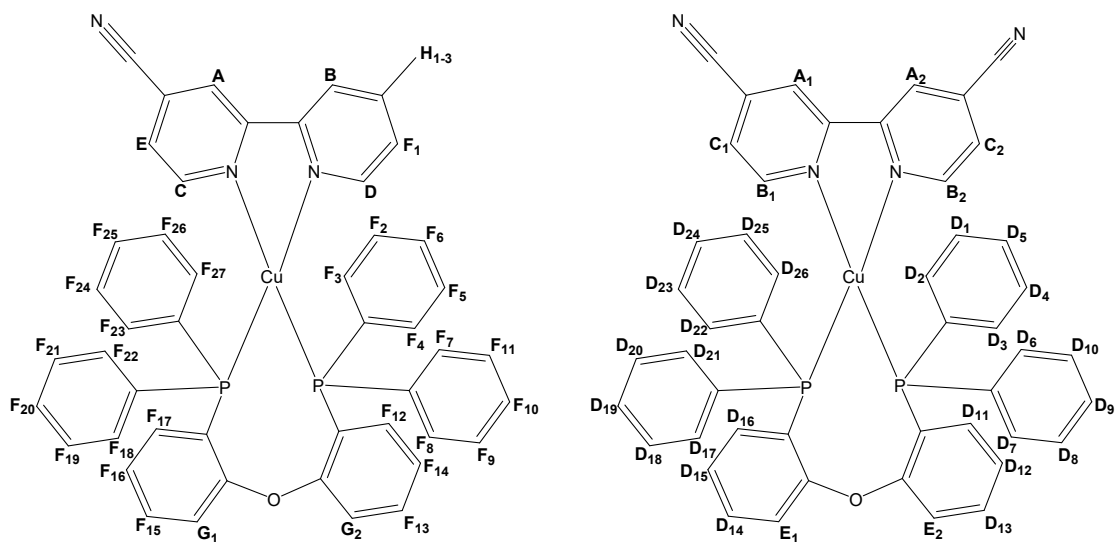

Figure S5.- Alphabetical assignment of the protons of (1, Left) and (2, Right). The bond distances and angle values are arbitrary.

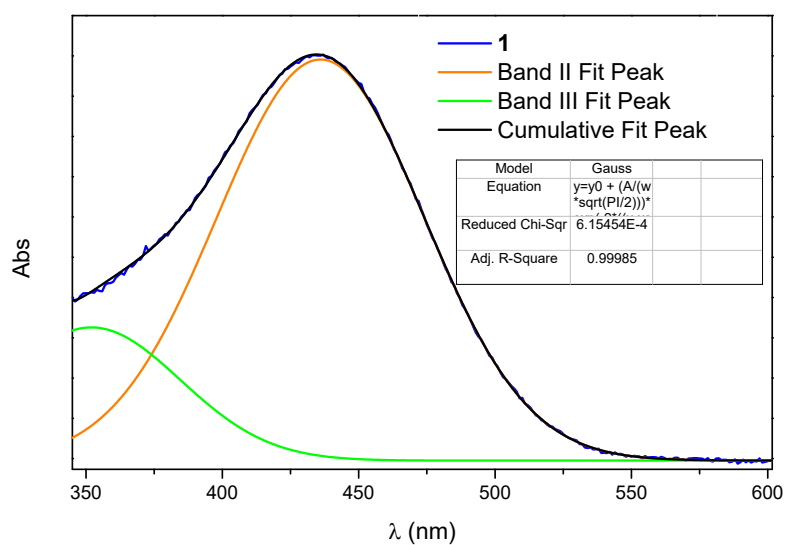

Figure S6.- MLCT Band II of (1) fitted with two Gaussian functions. The curves corresponding to the LC transitions are not shown, since their contribution is negligible in this region of the spectrum. **Inset table:** calculated fit parameters.

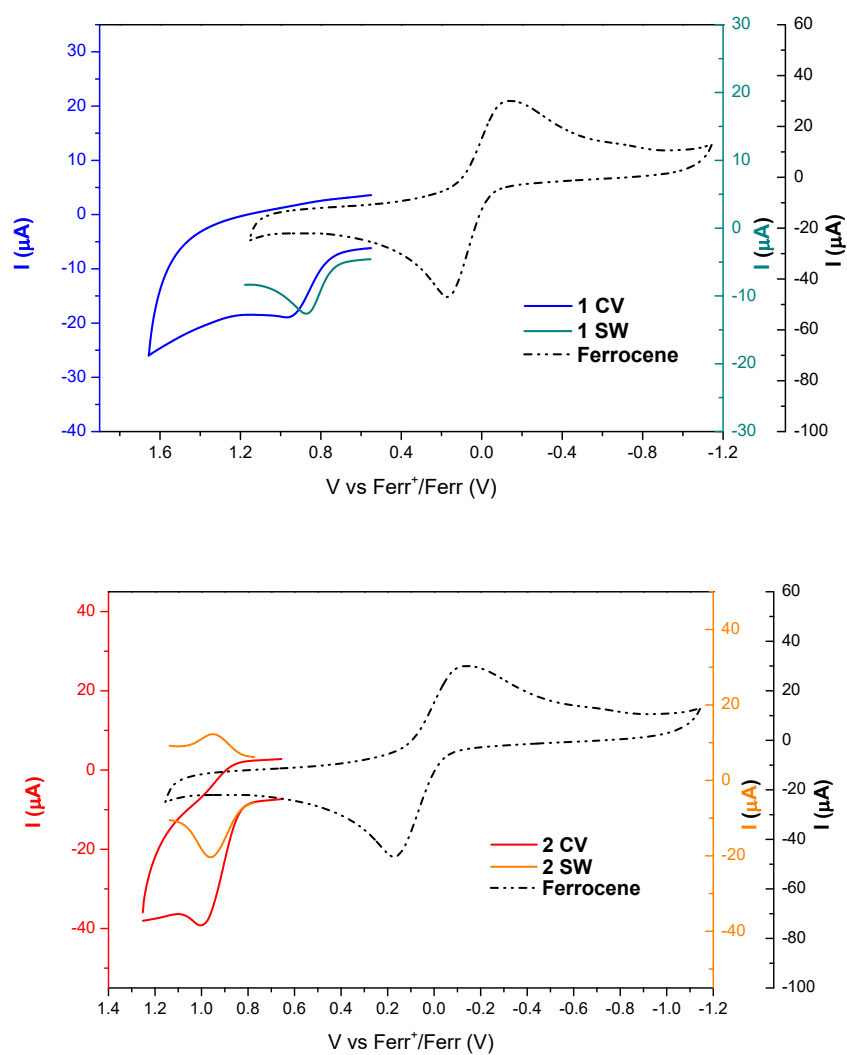

**Figure S7.-** Cyclic and square wave voltammograms for the first oxidation wave of **(1)** and **(2)** in  $\text{CH}_2\text{Cl}_2$  0.1 M TBAH. WE: Glassy carbon, IRE: Ferrocene, CE: Pt wire,  $\nu = 100 \text{ mV s}^{-1}$ . In **blue** and **red** are showing the cyclic voltammograms of **(1)** and **(2)**, respectively, while in **dark cyan** and **orange** the square wave voltammograms of **(1)** and **(2)** are presented. The Cyclic voltammogram of ferrocene is showed in dashed-dot **black** line.

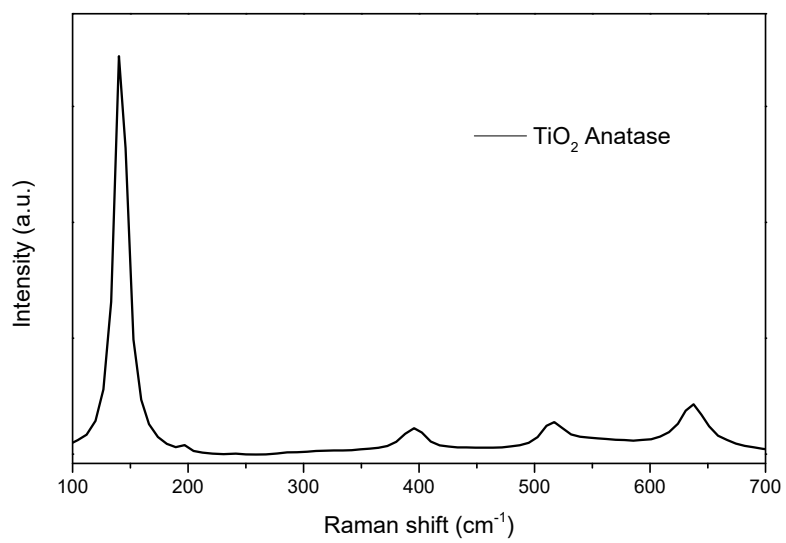

**Figure S8.-** Raman Spectrum of FTO/TiO<sub>2</sub>.  $\lambda= 532$  nm.
